# Supplementary material
Source: MDPI journal article supplement (https://www.mdpi.com/2073-4344/11/6/729)
Supplement: s1 [file s1]

# Inversion of the Photogalvanic Effect of Conductive Polymers by Porphyrin Dopants

Alexey A. Petrov <sup>1</sup>, Daniil A. Lukyanov <sup>1</sup>, Oleg A. Kopytko <sup>1</sup>, Julia V. Novoselova <sup>1</sup>, Elena V. Alekseeva <sup>1</sup> and Oleg V. Levin <sup>1,\*</sup>

Institute of Chemistry, St. Petersburg State University, Universitetskii pr. 26, Peterhof, 198504 St. Petersburg, Russia; barmalei01@mail.ru (A.P.); lida93@yandex.ru (D.L.); kopytko2015@yandex.ru (O.K.); julivit.n@gmail.com (J.N.); alekseeva\_ev@yahoo.com (E.A.); o.levin@spbu.ru (O.L.)

\* Correspondence: o.levin@spbu.ru; Tel.: +7-(812)-4286900

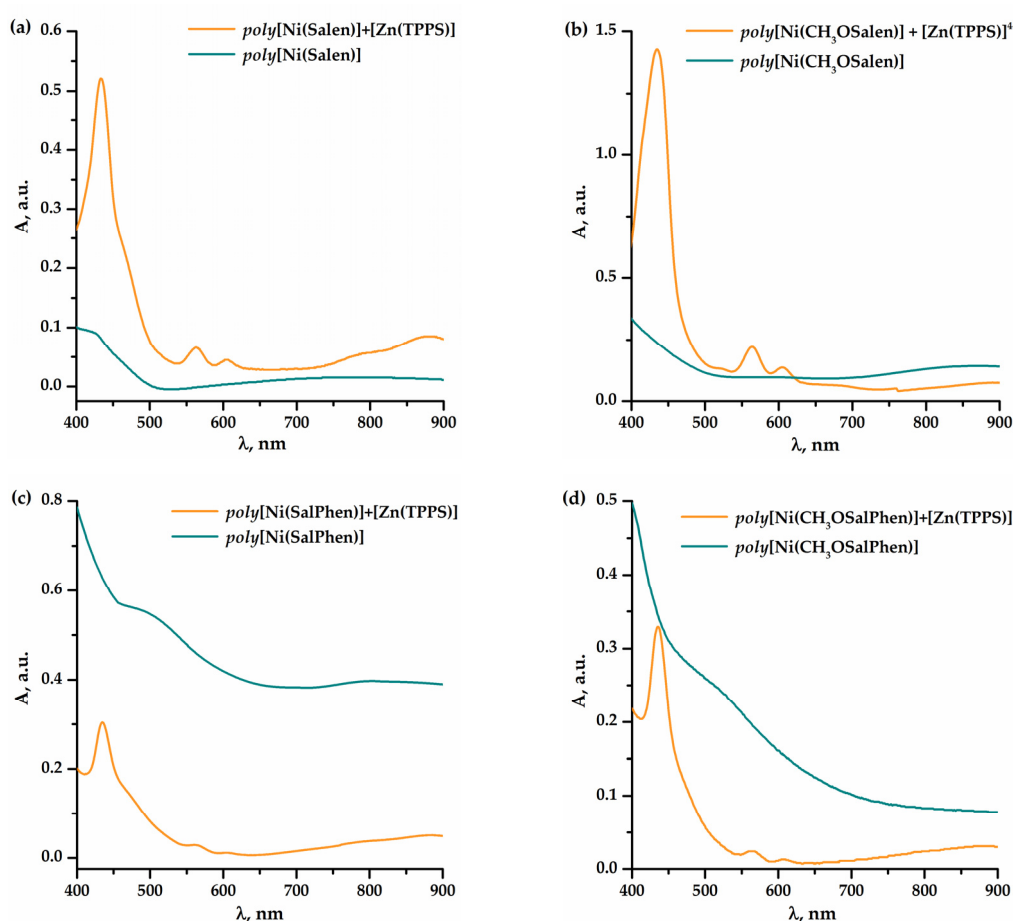

**Figure S1.** UV-Vis spectra of pristine and zinc porphyrin-doped NiSalen films.

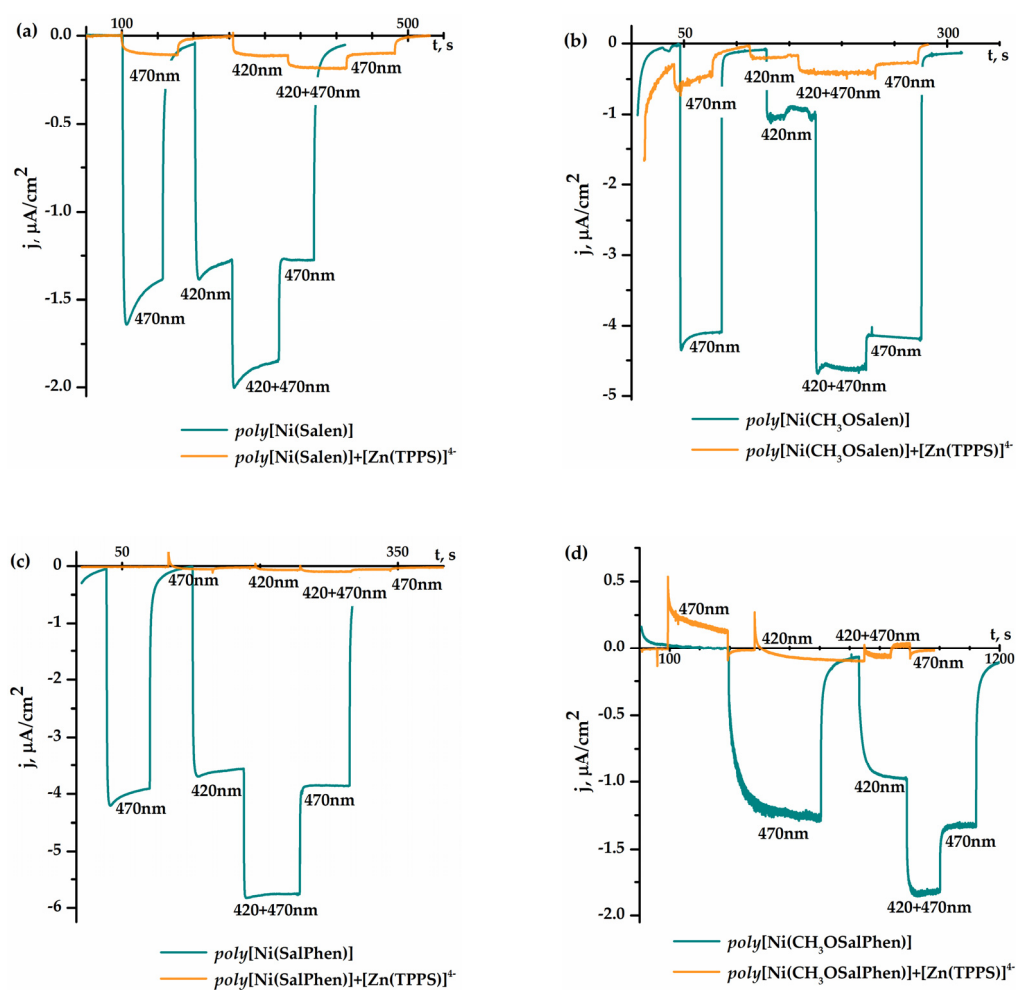

Figure S2. Oxygen reduction photocurrents on NiSalen polymer films.

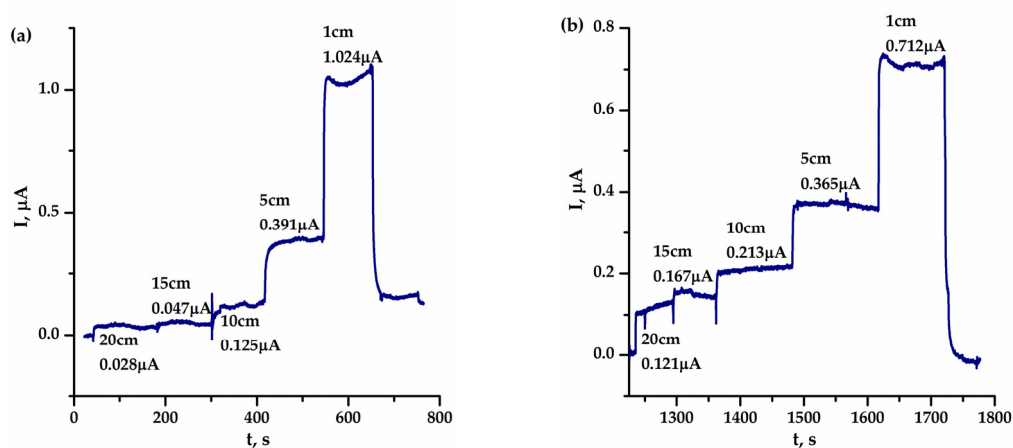

Figure S3. Photocurrents on  $\text{poly}[\text{Ni}(\text{SalPhen})] + [\text{Zn}(\text{TPPS})]$  films with irradiation at different range between diode ((a) 470 nm; (b) 420 nm) and cell.

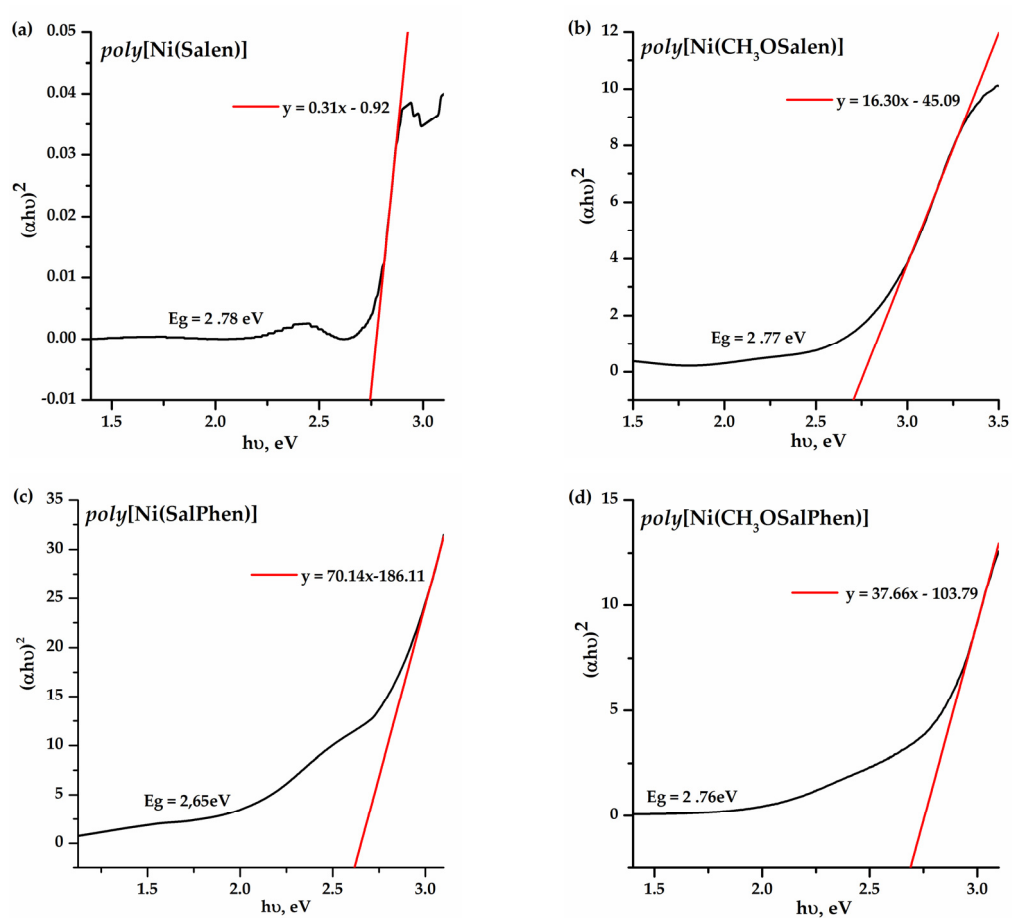

**Figure S4.** The Tauc plots for calculating optical bandgap of NiSalen complexes studied.

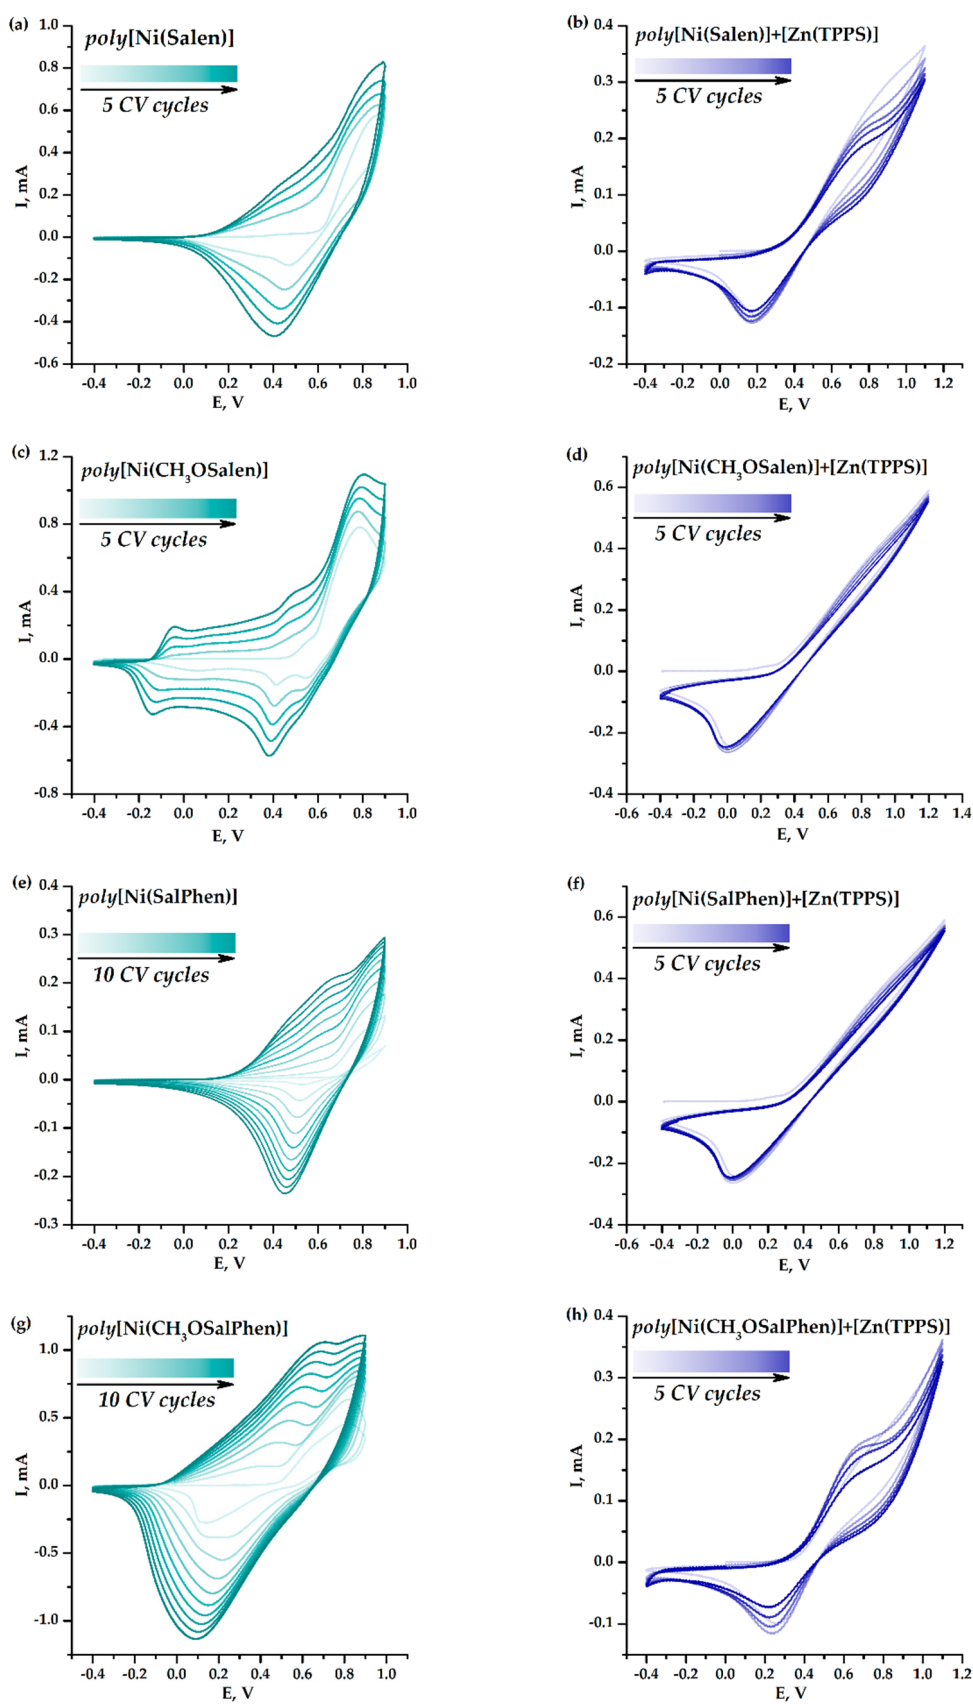

Figure S5. The cyclic voltammogram of polymerization of pristine and doped NiSalen complexes.
